# Supplementary material for: Receiver function analyses of Uturuncu volcano, Bolivia and vicinity
Source: Oxford University Press journal article supplement (doi:10.1130/ges01560.1), 2017-11-22
Supplement: ges01560_suptabs1.xlsx [file ges01560_suptabs1.xlsx]

## Sheet: Sheet1
		TABLE 1. DEPLOYMENT SCHEDULE FOR SEISMIC STATIONS
Station name	On date	Off date	Latitude	Longitude	Elevation (km)
PL03	Apr 2010	Mar 2012	-22.0156	-66.9451	4.6285
PL07	Apr 2011	Nov 2012	-22.3938	-67.0205	4.6414
PLAN	Apr 2011	Mar 2012	-22.6445	-67.3866	4.6967
PLAR	Apr 2010	Mar 2012	-22.4873	-66.9778	4.632
PLBR	Apr 2011	Nov 2012	-22.3055	-67.2356	4.795
PLCL	Apr 2011	Nov 2012	-21.9065	-67.0294	4.3543
PLCM	Oct 2010	Nov 2012	-22.2419	-67.2054	5.15
PLCO	Apr 2011	May 2012	-22.4615	-67.4372	4.6885
PLDK	Apr 2011	Oct 2011	-22.1551	-66.9784	4.5524
PLLB	Apr 2010	Sep 2010	-21.8955	-67.3796	4.0855
PLKN	Apr 2011	July 2011	-21.9576	-67.2604	4.5423
PLHS	Oct 2011	Mar 2012	-21.9566	-67.2594	4.5335
PLJR	Apr 2011	Nov 2012	-22.0475	-67.3487	4.2437
PLLA	Apr 2010	Mar 2012	-22.3126	-67.3796	4.242
PLLC	Apr 2011	Nov 2012	-22.1415	-67.5879	4.7494
PLSM	Apr 2010	Mar 2012	-22.113	-67.2844	4.216
PLLL	Apr 2010	Mar 2012	-22.4205	-67.15	4.7503
PLLO	Apr 2010	Aug 2010	-22.3337	-67.0793	4.579
PLMD	Apr 2011	June 2011	-22.549	-67.1912	4.6339
PLMK	Apr 2010	Oct 2011	-22.2515	-67.0769	4.4835
PLMN	Apr 2011	Mar 2012	-22.1607	-67.1207	4.5125
PLQU	Apr 2010	Feb 2012	-22.1906	-67.3389	4.1525
PLRR	Apr 2010	Mar 2012	-22.2611	-66.882	4.4805
PLRV	Apr 2011	Nov 2012	-22.2843	-67.5933	4.8659
PLSE	Apr 2010	Mar 2012	-22.4466	-67.2902	4.6799
PLSP	Apr 2011	Nov 2012	-22.6698	-67.1208	4.7267
PLSQ	Apr 2010	Mar 2012	-22.4197	-67.6381	4.8115
PLSS	Nov 2010	Mar 2012	-22.3168	-67.1715	4.6864
PLTM	Apr 2010	Oct 2011	-22.0634	-67.1671	4.7028
PLTP	Apr 2011	Feb 2012	-22.0413	-66.7865	4.3881
PLTT	Oct 2011	Nov 2012	-22.5937	-67.279	4.6387
PLVB	Oct 2011	Mar 2012	-22.0632	-67.1676	4.7099
PLWB	Apr 2011	Nov 2012	-22.3537	-66.8347	4.4915
